# Supplementary material for: Down-regulated GATA-1 up-regulates interferon regulatory factor 3 in lung adenocarcinoma
Source: PubMed Central journal article supplement (PMC5451405; doi:10.1038/s41598-017-02700-5), 2017-05-31

## SUPPLEMENTARY INFORMATION

### Down-regulated GATA-1 up-regulates interferon regulatory factor 3 in lung adenocarcinoma

Lu-Lu Wang<sup>1</sup>, Zheng-Sen Chen<sup>2</sup>, Wen-Di Zhou<sup>3</sup>, Jin Shu<sup>4</sup>, Xiao-Hua Wang<sup>5</sup>, Rui Jin<sup>1</sup>, Li-Li Zhuang<sup>1</sup>, Mir Alireza Hoda<sup>6</sup>, Hao Zhang<sup>7\*</sup>, Guo-Ping Zhou<sup>1\*</sup>

<sup>1</sup> Dpartment of Pediatrics, The First Affiliated Hospital, Nanjing Medical University, Nanjing, Jiangsu Province, China,

<sup>2</sup> Department of Urology, The Second Affiliated Hospital, Nanjing Medical University, Nanjing, Jiangsu Province, China,

<sup>3</sup> Dpartment of Pediatrics, Huai'an First People's Hospital, Nanjing Medical University, Huai'an, Jiangsu Province, China,

<sup>4</sup> Department of Pediatric Respiration, Affiliated Wuxi People's Hospital, Nanjing Medical University, Wuxi, Jiangsu Province, China,

<sup>5</sup> Dpartment of Pediatrics, Nanjing First Hospital, Nanjing Medical University, Nanjing, Jiangsu Province, China,

<sup>6</sup> Translational Thoracic Oncology Laboratory, Division of Thoracic Surgery, Department of Surgery, Comprehensive Cancer Center, Medical University Vienna, Vienna, Austria,

<sup>7</sup> Department of Thoracic and Cardiovascular Surgery, Affiliated Hospital of Xuzhou Medical University, Xuzhou, Jiangsu Province, China.

Corresponding to: Guo-Ping Zhou, Email: guopingzhou@aliyun.com

Hao Zhang, Email: zhanghao@xzhmu.edu.cn

### Supplementary Figure S1. Gel from the article.

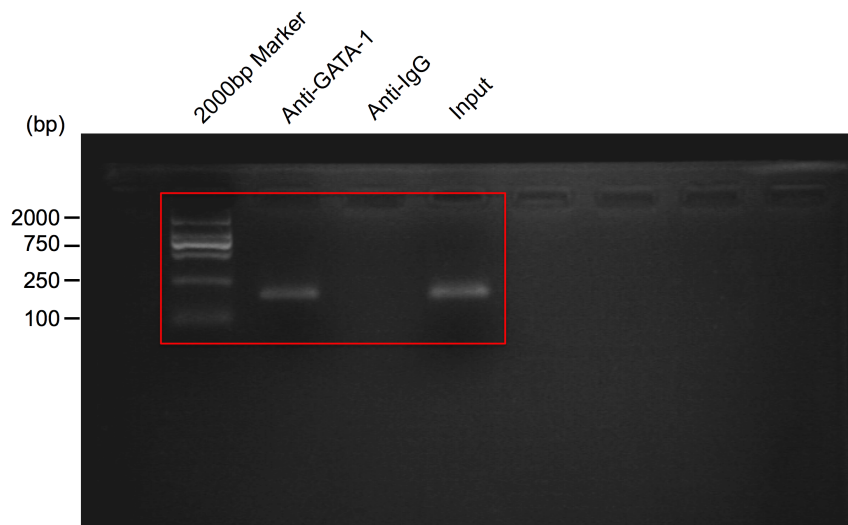

**Supplementary Figure S2. Western Blot from the article.**

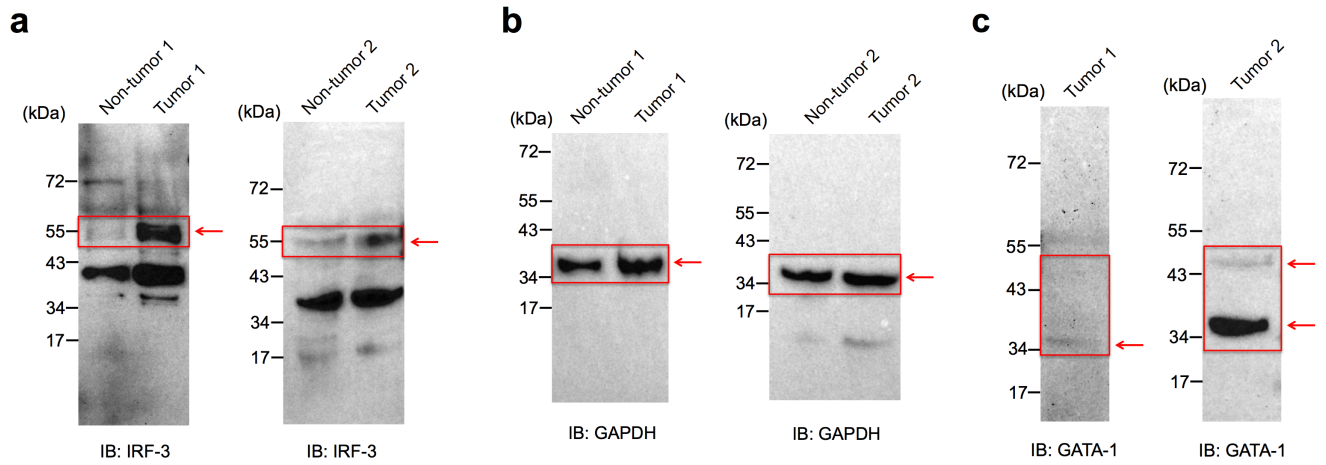

**Supplementary Figure S3. Western Blot from the article.**

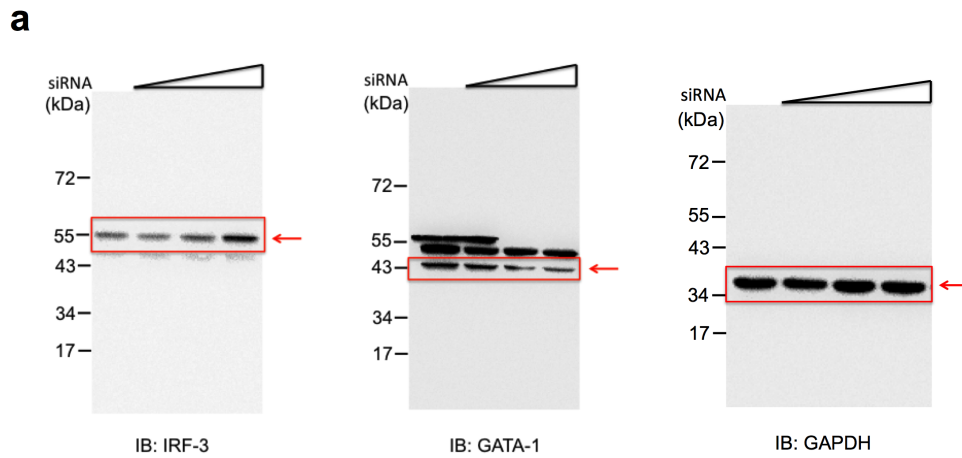

**Supplementary Figure S4.**

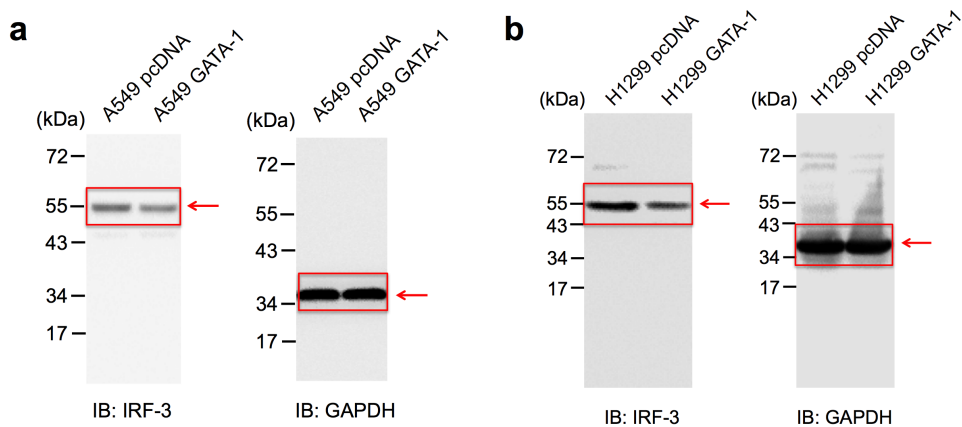

**Supplementary Figure S5. Overexpression of GATA-1 level decreases IRF-3 protein expression.** (a) IRF-3 protein expression was decreased by overexpressed GATA-1 in HEK293 and HeLa cells. GAPDH was used as a loading control. Full-length blots are also presented.

**a**

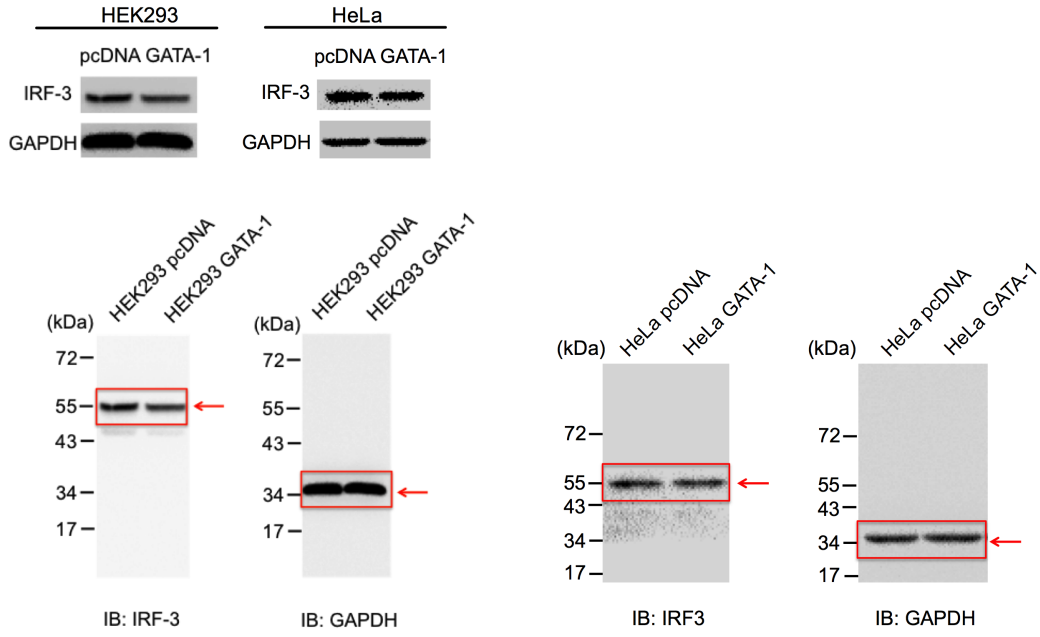

Supplement: 41598_2017_2700_MOESM1_ESM.pdf [file 41598_2017_2700_MOESM1_ESM.pdf]
